# Supplementary material for: Construction of a novel electrochemical sensor based on biomass material nanocellulose and its detection of acetaminophen
Source: Royal Society of Chemistry journal article supplement (doi:10.1039/d2ra04125a), 2022-01-01
Supplement: d2ra04125a1.pdf [file d2ra04125a1.pdf]

## Supporting Information

### Construction of a novel electrochemical sensor based on biomass material nanocellulose and its detection of acetaminophen

Sichen Liu<sup>a</sup>, Yanbo Yu<sup>a</sup>, Kelu Ni<sup>a</sup>, Tongda Liu<sup>a</sup>, Min Gu<sup>a</sup>, Yingchen Wu<sup>a</sup>, Guanben  
Du<sup>a,b,\*</sup>, Xin Ran<sup>a,b,\*</sup>

<sup>a</sup> International Joint Research Center for Biomass Materials, Yunnan Province Key  
Lab of Wood Adhesives and Glued Products, Southwest Forestry University,  
Kunming 650224, China

<sup>b</sup> Key Laboratory for Forest Resources Conservation and Utilization in the Southwest  
Mountains, Ministry of Education, Southwest Forestry University, Kunming 650224,  
China

#### \*Corresponding Authors

\*E-mail: guanben@swfu.edu.cn (G. Du); ranxin3169@sina.com (X. Ran)

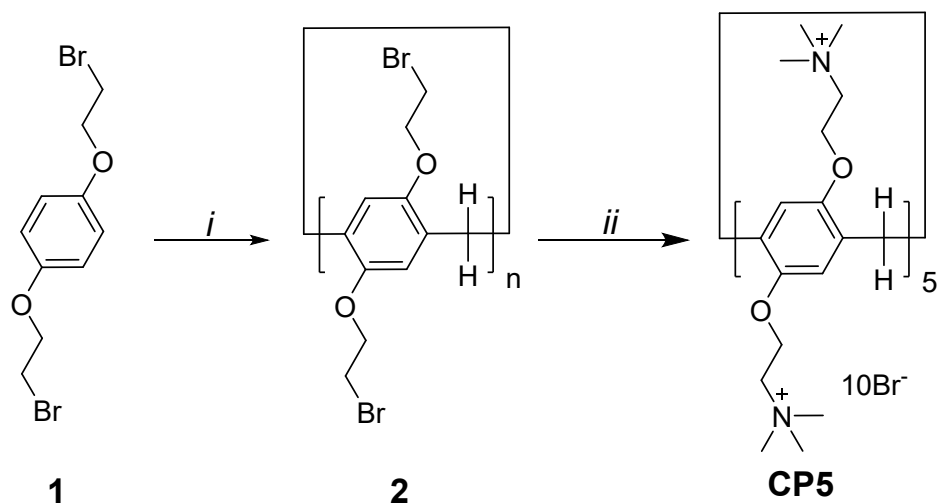

**Fig.S1** The synthetic route of CP5.

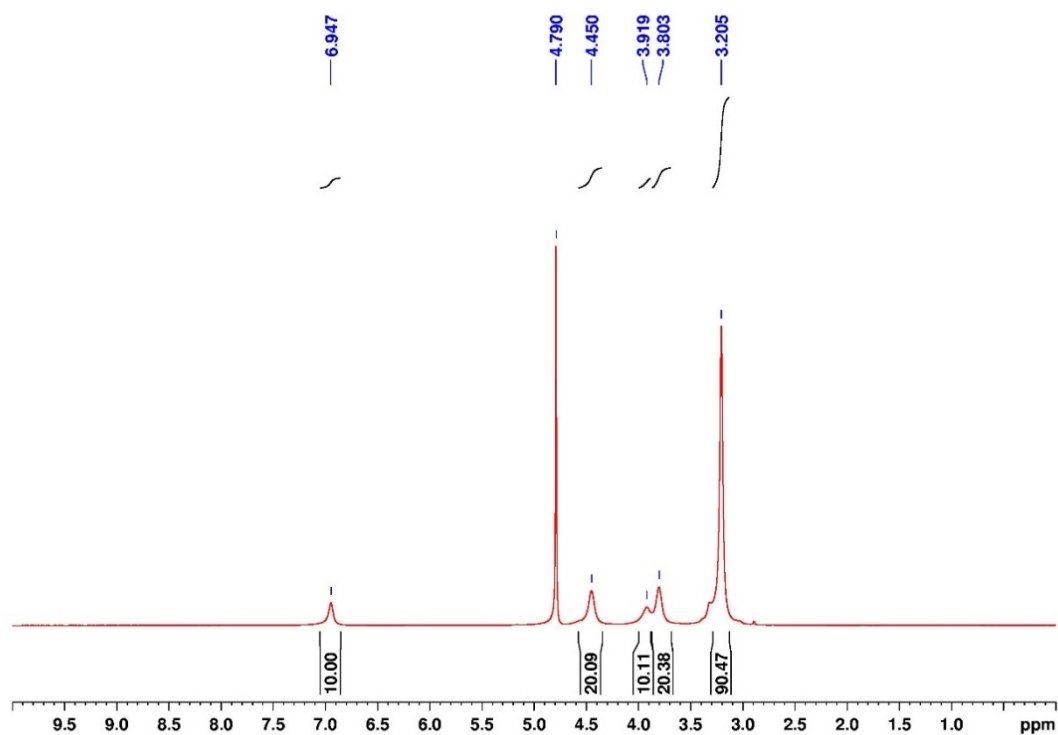

**Fig.S2**  $^1\text{H}$  NMR spectrum (400 MHz,  $\text{D}_2\text{O}$ , rt) of CP5.

$^1\text{H}$  NMR (400 MHz,  $\text{D}_2\text{O}$ , rt)  $\delta$  (ppm): 6.947 (s, 10H, 10ArH), 4.450 (s, 20H, 10ArOCH<sub>2</sub>), 3.919 (s, 10H, 5ArCH<sub>2</sub>Ar), 3.803 (s, 20H, 10ArOCH<sub>2</sub>), 3.205 (s, 90H, 30NCH<sub>3</sub>).

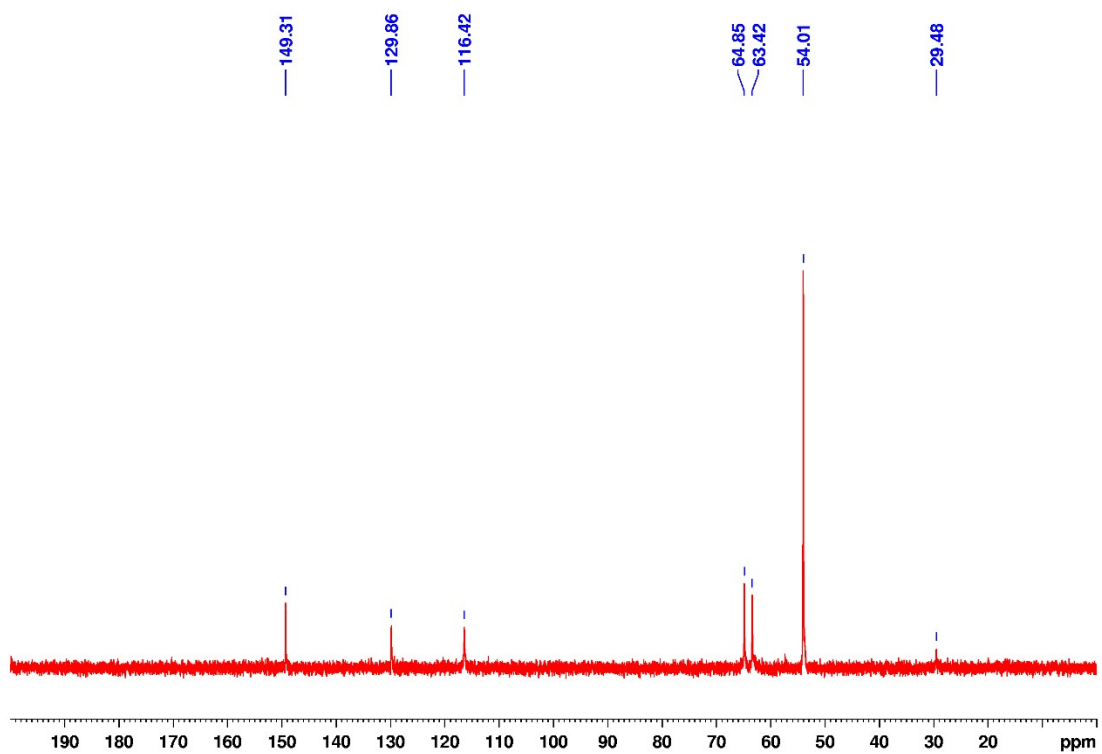

**Fig.S3**  $^{13}\text{C}$  NMR spectrum (100 MHz,  $\text{D}_2\text{O}$ , rt) of CP5.

$^{13}\text{C}$  NMR (100 MHz,  $\text{D}_2\text{O}$ , rt)  $\delta$  (ppm): 149.31, 129.86, 116.42, 64.85, 63.42, 54.01.

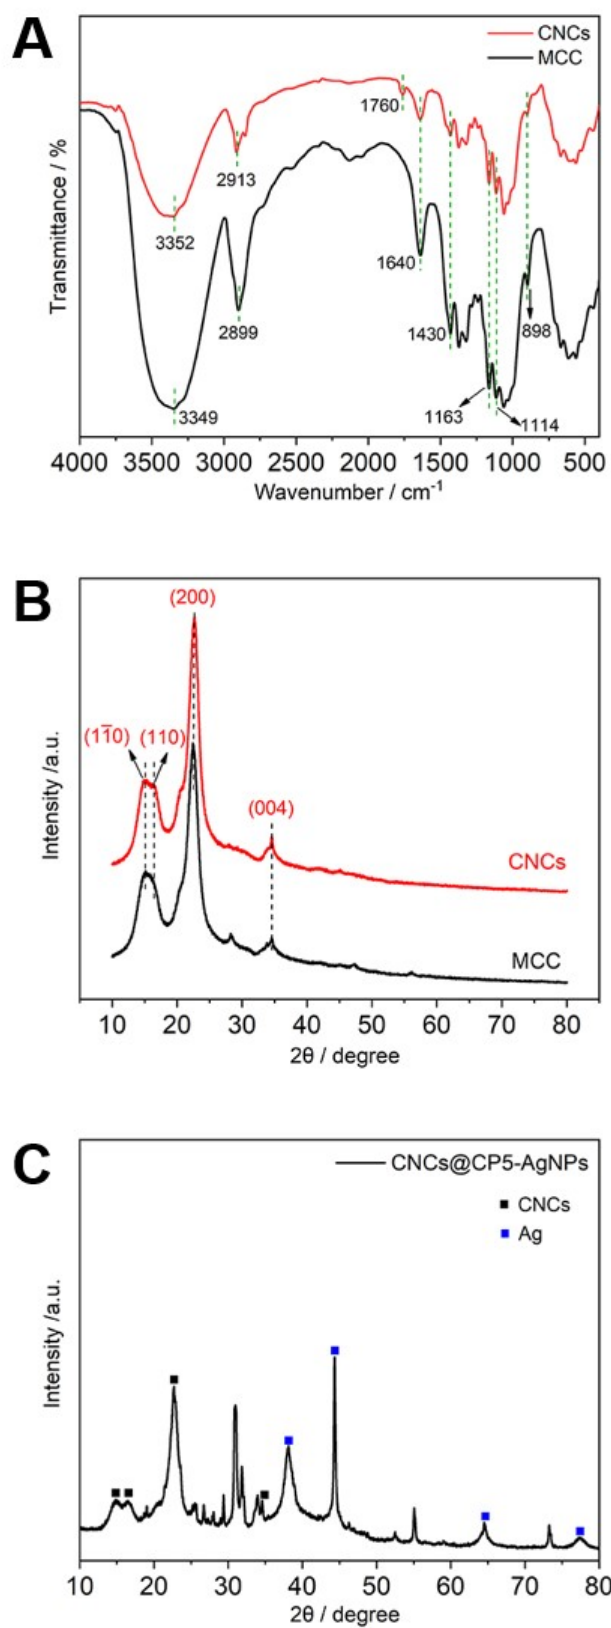

**Fig.S4** (A) FT-IR of CNCs and MCC; XRD spectrum of (B) CNCs, MCC; (C) CNCs@CP5-AgNPs.

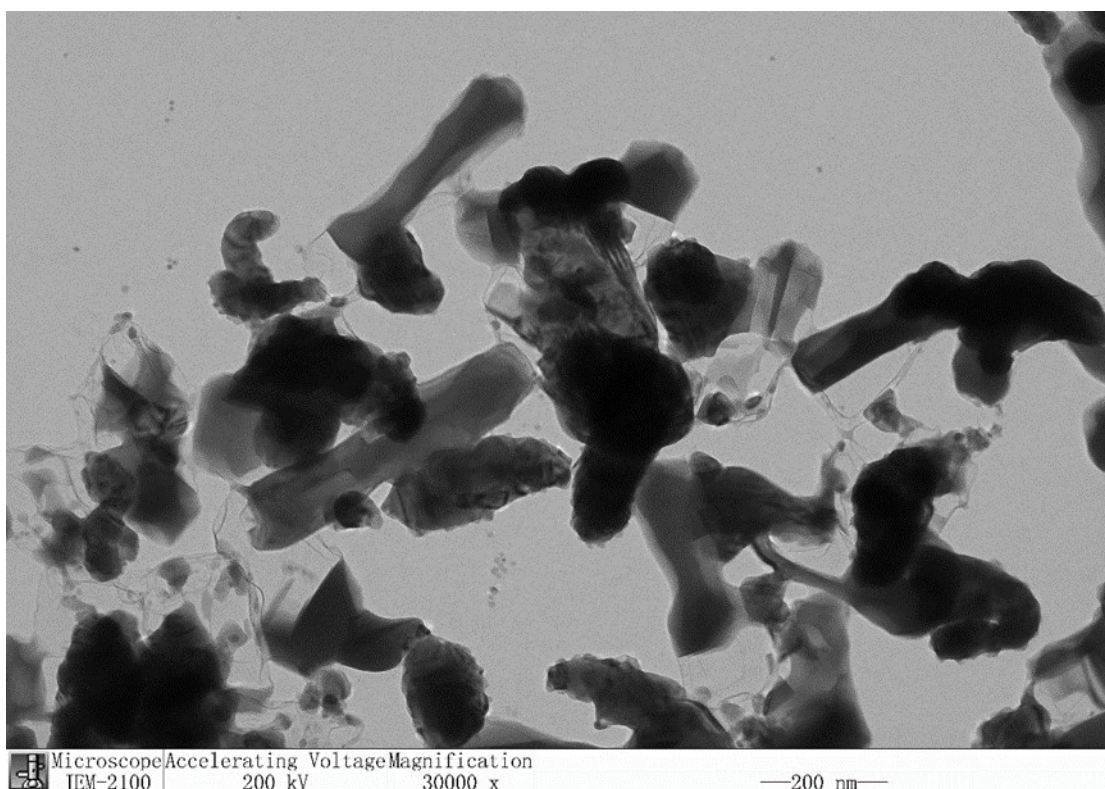

**Fig S5** The TEM image of AgNPs was prepared in the absence of CP5.

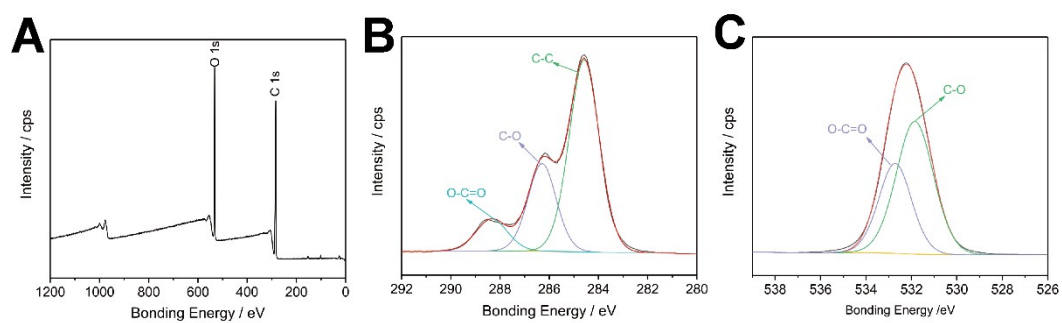

**Fig S6** (A) XPS spectrum of CNCs; high-resolution XPS of (B) C 1s; (C) O 1s.

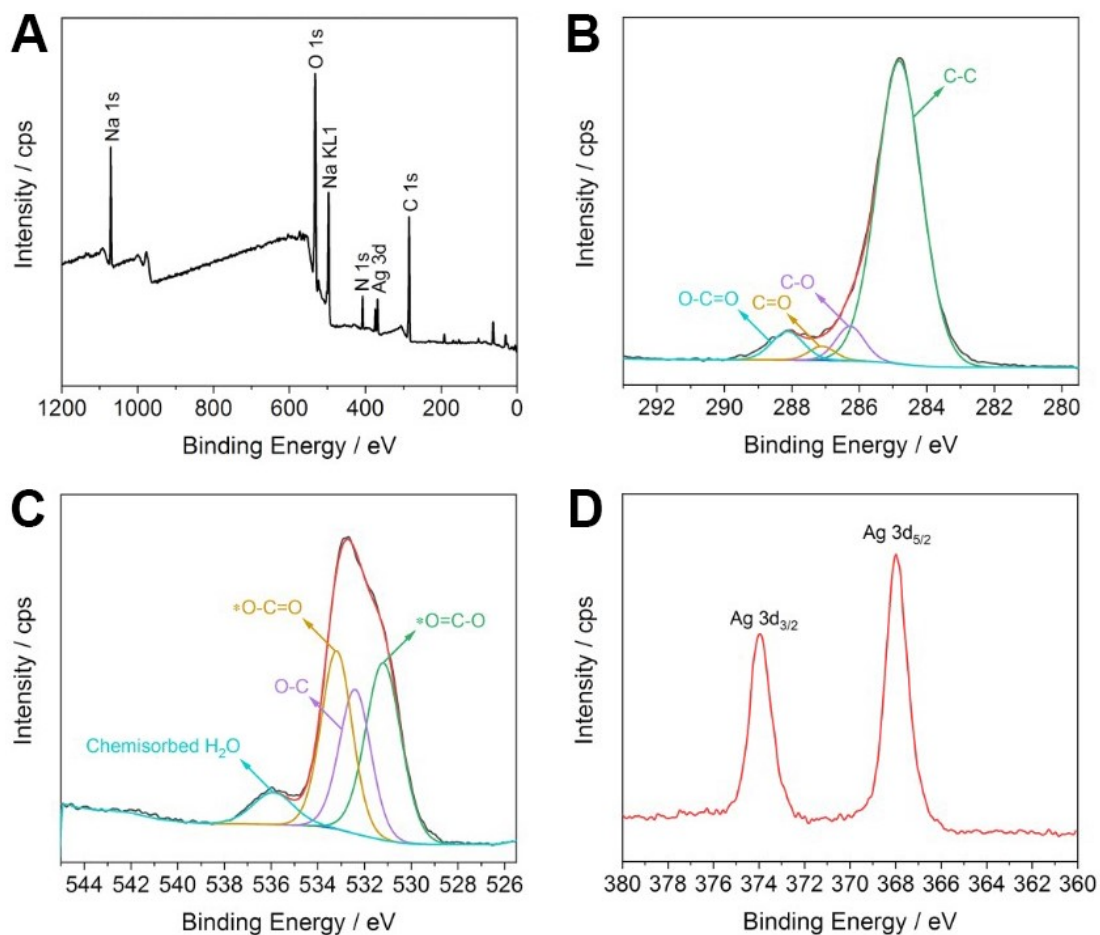

**Fig S7** (A) XPS spectrum of CP5-AgNPs; high-resolution XPS of (B) C 1s; (C) O 1s; (D) Ag 3d.

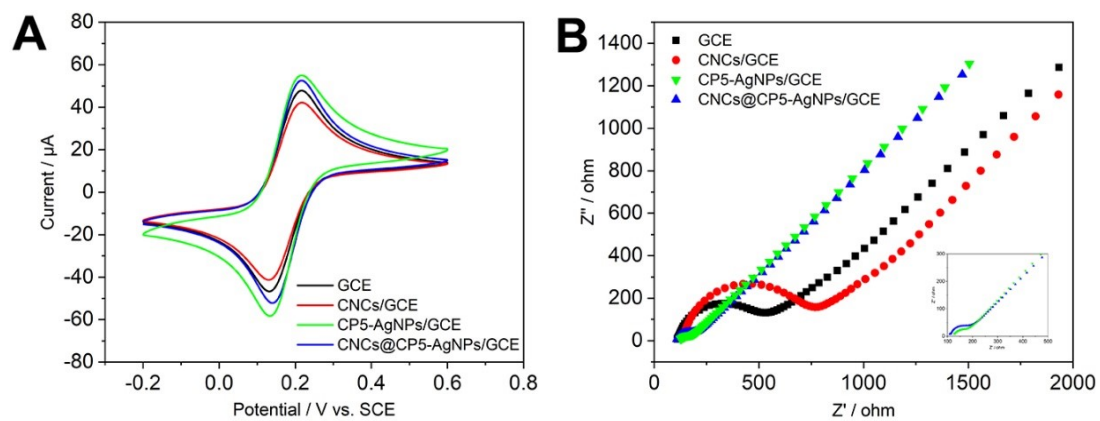

**Fig.S8** CV curves of different electrodes in 2 mM [Fe(CN)<sub>6</sub>]<sup>3-/4-</sup> solution(A), EIS spectrum(B).

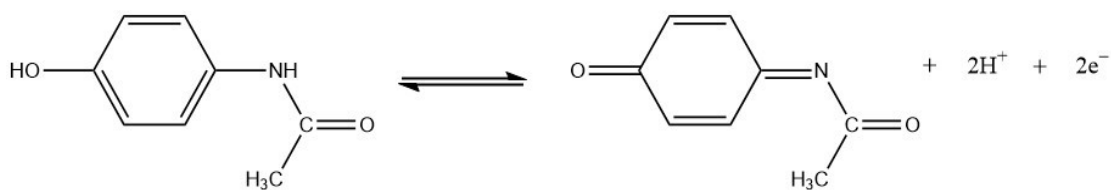

**Fig.S9** Reaction mechanism of AP on electrode.

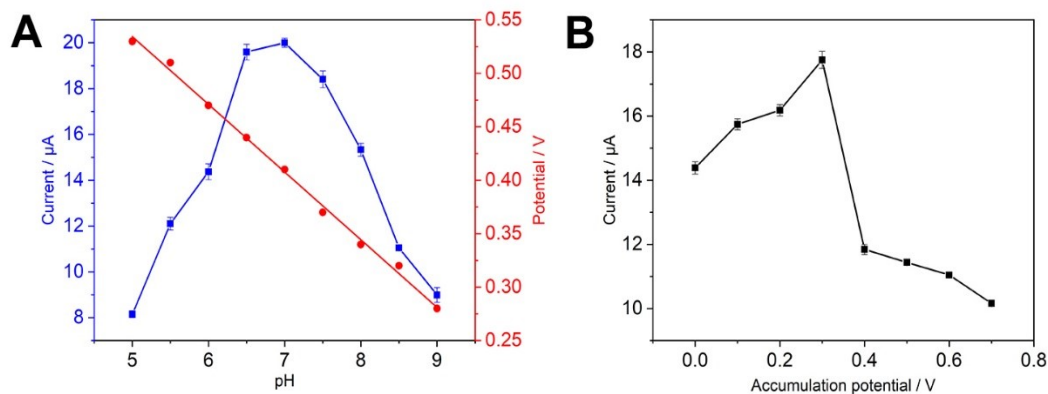

**Fig.S10** Effect of pH on peak current and potential of AP(A), effect of accumulation potential on peak current of AP(B).

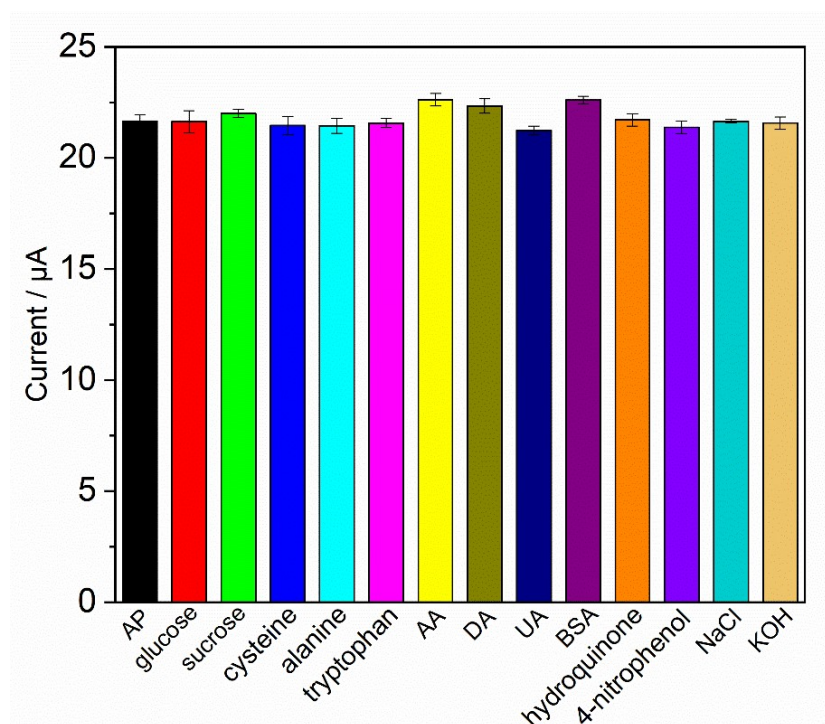

**Fig.S11** Selective experiment of AP.
